# Supplementary material for: Ferryl Hemoglobin Inhibits Osteoclastic Differentiation of Macrophages in Hemorrhaged Atherosclerotic Plaques
Source: Hindawi journal article supplement (doi:10.1155/2020/3721383), 2020-02-27

Supplementary figure 1

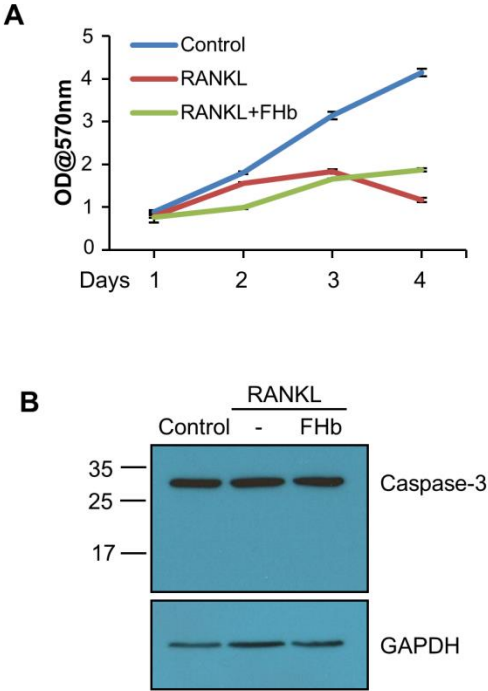

Supplementary figure 2

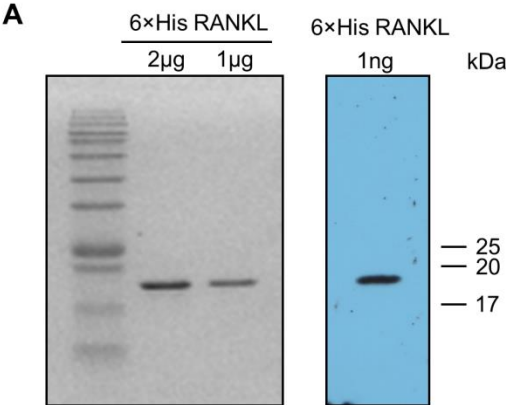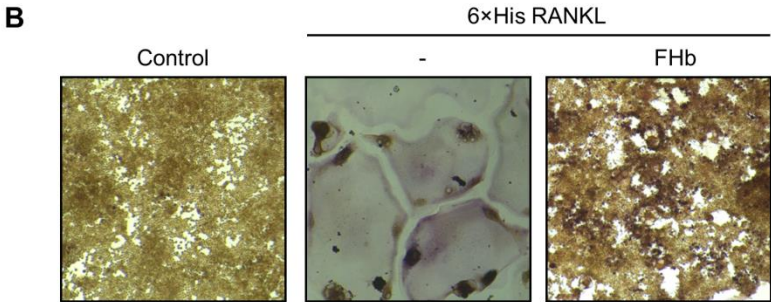

Supplement: f1 [file 3721383.f1.pdf]
